# Supplementary material for: g-C3N4 nanosheet supported NiCo2O4 nanoparticles for boosting degradation of tetracycline under visible light and ultrasonic irradiation
Source: Royal Society of Chemistry journal article supplement (doi:10.1039/d4nr01611d), 2024-01-01
Supplement: d4nr01611d1.pdf [file d4nr01611d1.pdf]

## ***Supporting Information***

# **g-C<sub>3</sub>N<sub>4</sub> Nanosheets Supported NiCo<sub>2</sub>O<sub>4</sub> Nanoparticles for Boosting Degradation of Tetracycline under Visible Light and Ultrasonic Irradiation**

**Qingfeng Guo <sup>ab</sup>, Changwang Yan <sup>a</sup>, Zhenqian Huang <sup>c</sup>, Yujie Liu <sup>c</sup>, Deshan Cheng <sup>a</sup>, Chaoyang Lu <sup>d</sup>, Jianhua Ran <sup>ac\*</sup>, and Yingkui Yang <sup>a\*</sup>**

*<sup>a</sup> State Key Laboratory of New Textile Materials and Advanced Processing Technologies, Wuhan Textile University, Wuhan 430200, China*

*Email: [ykyang@wtu.edu.cn](mailto:ykyang@wtu.edu.cn)*

*<sup>b</sup> Engineering Research Center for Clean Production of Textile Dyeing and Printing, Ministry of Education, Wuhan Textile University, Wuhan 430200, China*

*<sup>c</sup> Hubei Key Laboratory of Biomass Fiber and Ecological Dyeing and Finishing, Wuhan Textile University, Wuhan 430020, China*

*Email: [jhran@wtu.edu.cn](mailto:jhran@wtu.edu.cn)*

*<sup>d</sup> Qianshui (Hubei) Environmental Technology Co., Ltd. Tianmen 431700, China*

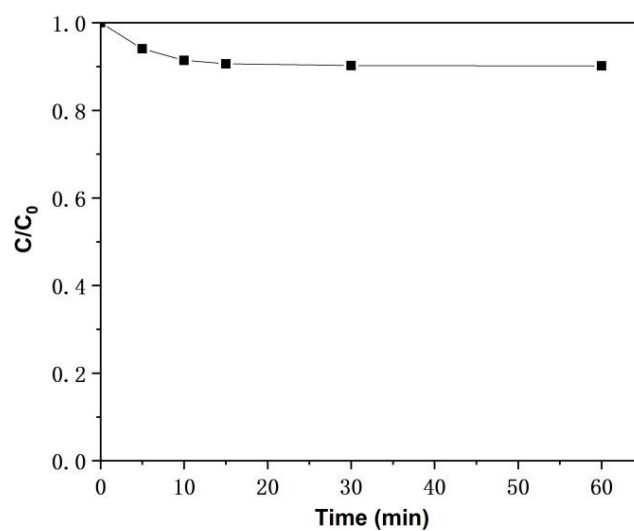

**Fig. S1** The degradation rate of NiCo<sub>2</sub>O<sub>4</sub>/g-C<sub>3</sub>N<sub>4</sub> catalyst without light irradiation.

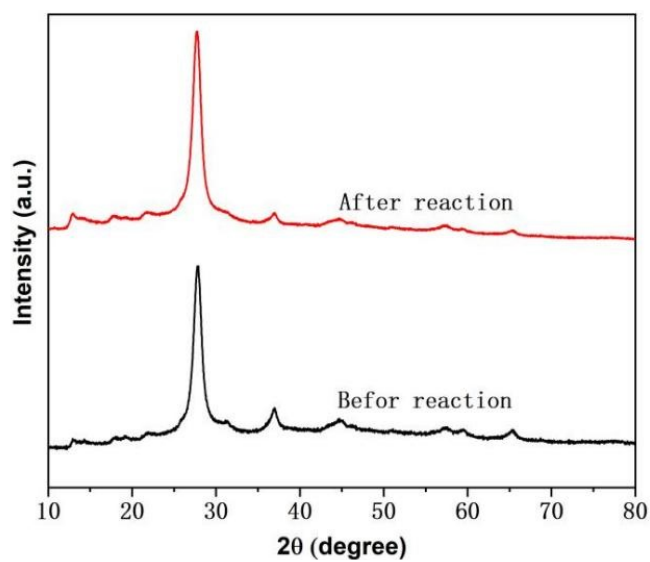

**Fig. S2** The XRD patterns of NiCo<sub>2</sub>O<sub>4</sub>/g-C<sub>3</sub>N<sub>4</sub> catalyst before and after the reaction.

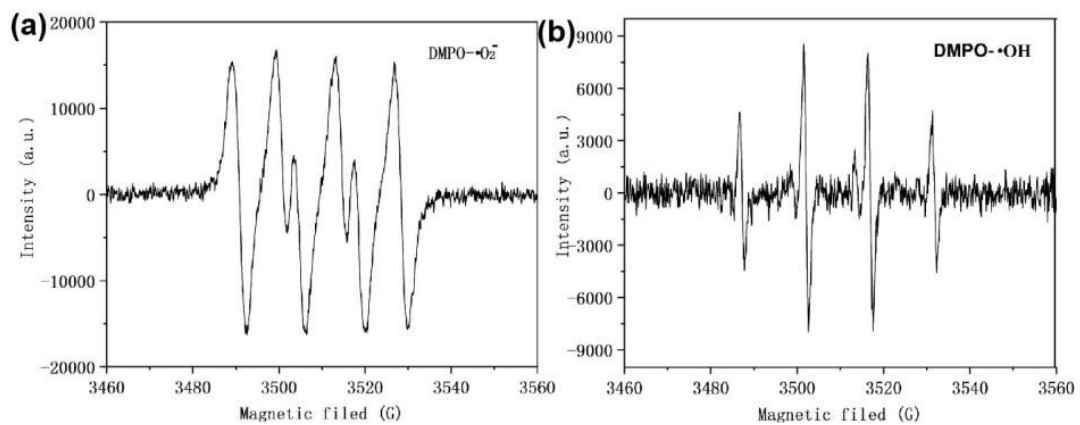

**Fig. S3** EPR spectra of NiCo<sub>2</sub>O<sub>4</sub>/g-C<sub>3</sub>N<sub>4</sub> composite for detection of (a) DMPO-•O<sub>2</sub><sup>-</sup> and (b) DMPO-•OH during visible light irradiation.

**Table S1.** Efficiency comparison of g-C<sub>3</sub>N<sub>4</sub> composite catalysts for TCH degradation

| Catalyst                                                                            | Target pollutant | Experimental condition            | Efficiency(%)     | Ref.      |
|-------------------------------------------------------------------------------------|------------------|-----------------------------------|-------------------|-----------|
| Ti <sub>0.7</sub> Sn <sub>0.3</sub> O <sub>2</sub> /g-C <sub>3</sub> N <sub>4</sub> | TCH              | Visible light                     | 88% in 40 min     | [1]       |
| 2D/2D CuInS <sub>2</sub> /g-C <sub>3</sub> N <sub>4</sub>                           | TCH              | Visible light                     | 83.7% in 60 min   | [2]       |
| WO <sub>3</sub> @ g-C <sub>3</sub> N <sub>4</sub> @ MWCNTs                          | TCH              | Visible light                     | 79.54% in 120 min | [3]       |
| AgPO <sub>4</sub> /g-C <sub>3</sub> N <sub>4</sub> /ZnO                             | TCH              | Visible light                     | 88.47% in 120 min | [4]       |
| Carbon dots modified MoO <sub>3</sub> /g-C <sub>3</sub> N <sub>4</sub>              | TCH              | Visible light                     | 88.4% in 90 min   | [5]       |
| NiCo <sub>2</sub> O <sub>4</sub> / g-C <sub>3</sub> N <sub>4</sub>                  | TCH              | Visible light                     | 65% in 60 min     | This work |
| NiCo <sub>2</sub> O <sub>4</sub> / g-C <sub>3</sub> N <sub>4</sub>                  | TCH              | Visible light and ultrasonic 400W | 90% in 15 min     | This work |

## References

- [1] B. Guo, B. Liu, C. Wang, Y. Wang, S. Yin, MS. Javed, W. Han, S-scheme  $\text{Ti}_{0.7}\text{Sn}_{0.3}\text{O}_2/\text{g-C}_3\text{N}_4$  heterojunction composite for enhanced photocatalytic pollutants degradation, *J Environ. Chem. Eng.* 10(2) (2022) 107118.
- [2] F. Guo, W. Shi, M. Li, Y. Shi, H. Wen, 2D/2D Z-scheme heterojunction of  $\text{CuInS}_2/\text{g-C}_3\text{N}_4$  for enhanced visible-light-driven photocatalytic activity towards the degradation of tetracycline. *Sep. Purif. Technol.* 210 (2019) 608-615.
- [3] VS. Manikandan, S. Harish, J. Archana, M. Navaneethan, Fabrication of novel hybrid Z-Scheme  $\text{WO}_3@\text{g-C}_3\text{N}_4@\text{MWCNT}$  nanostructure for photocatalytic degradation of tetracycline and the evaluation of antimicrobial activity, *Chemosphere* 287 (2022) 132050.
- [4] P. Zhu, M. Hu, M. Duan, M. Zhao, High visible light response Z-scheme  $\text{Ag}_3\text{PO}_4/\text{g-C}_3\text{N}_4/\text{ZnO}$  composite photocatalyst for efficient degradation of tetracycline hydrochloride: preparation, properties and mechanism, *J Alloy. Compd.* 840 (2020) 155714.
- [5] Z. Xie, Y. Feng, F. Wang, D. Chen, Q. Zhang, Y. Zeng, W. Lv, G. Liu, Construction of carbon dots modified  $\text{MoO}_3/\text{g-C}_3\text{N}_4$  Z-scheme photocatalyst with enhanced visible-light photocatalytic activity for the degradation of tetracycline, *Appl. Catal. B: Environ.* 229 (2018) 96-104.
